# Supplementary material for: The Integrated Amendment of Sodic-Saline Soils Using Biochar and Plant Growth-Promoting Rhizobacteria Enhances Maize (Zea mays L.) Resilience to Water Salinity
Source: MDPI journal article supplement (doi:10.3390/plants10091960), 2021-09-20
Supplement: s1 [file s1]

# The integrated amendment of sodic-saline soils using biochar and plant growth-promoting rhizobacteria enhances maize (*Zea mays* L.) resilience to water salinity

Yasser Nehela <sup>1,2,\*</sup>, Yasser S. A. Mazrou <sup>3,4</sup>, Tarek Alshaal <sup>5,6</sup>, Asmaa M. S. Rady <sup>7</sup>, Ahmed M. El-Sherif <sup>8</sup>, Alaa El-Dein Omara <sup>9</sup>, Ahmed M. Abd El-Monem <sup>10</sup>, Emad M. Hafez <sup>11</sup>

<sup>1</sup> Department of Agricultural Botany, Faculty of Agriculture, Tanta University, Tanta 31527, Egypt; [yasser.nehela@ufl.edu](mailto:yasser.nehela@ufl.edu)

<sup>2</sup> Citrus Research and Education Center, Department of Plant Pathology, University of Florida, 700 Experiment Station Rd., Lake Alfred, FL 33850, USA.<sup>3</sup> Business Administration Department, Community college, King Khalid University, Guraiger, Abha 62529, Saudi Arabia; [ymazrou@kku.edu.sa](mailto:ymazrou@kku.edu.sa)

<sup>4</sup> Department of Agriculture Economic, Faculty of Agriculture, Tanta University, Tanta 31527, Egypt; [yasser.mazroua@agr.tanta.edu.eg](mailto:yasser.mazroua@agr.tanta.edu.eg)

<sup>5</sup> Agricultural Botany, Plant Physiology and Biotechnology Department, University of Debrecen, AGTC. 4032 Debrecen, Hungary; [alshaaltarek@gmail.com](mailto:alshaaltarek@gmail.com)

<sup>6</sup> Soil and Water Department, Faculty of Agriculture, University of Kafrelsheikh, 33516 Kafr El-Sheikh, Egypt; [tarek.ibrahim@agr.kfs.edu.eg](mailto:tarek.ibrahim@agr.kfs.edu.eg)<sup>7</sup> Crop Science Department, Faculty of Agriculture (EL-Shatby), Alexandria University, Alexandria 21545, Egypt; [asmaa.mohamed@alexu.edu.eg](mailto:asmaa.mohamed@alexu.edu.eg)

<sup>8</sup> Department of Agronomy, Faculty of Agriculture, Fayoum University 63514, Egypt; [ama16@fayoum.edu.eg](mailto:ama16@fayoum.edu.eg)

<sup>9</sup> Department of Microbiology, Soils, Water and Environment Research Institute, Agricultural Research Center, Giza 12112, Egypt; [ala.emara@yahoo.com](mailto:ala.emara@yahoo.com)

<sup>10</sup> Department of Agronomy, Faculty of Agriculture, New Valley University, New Valley, Elkharrga 72511 Egypt; [abdelmonem7@gmail.com](mailto:abdelmonem7@gmail.com)

<sup>11</sup> Department of Agronomy, Faculty of Agriculture, Kafrelsheikh University, 33516, Kafr El-Sheikh; Egypt; [emadhafez2012@agr.kfs.edu.eg](mailto:emadhafez2012@agr.kfs.edu.eg), [emadhafez2014@gmail.com](mailto:emadhafez2014@gmail.com).

\* Correspondence: [yasser.nehela@ufl.edu](mailto:yasser.nehela@ufl.edu)

---

**Table S1:** Activity of soil dehydrogenase and urease enzymes and count of some microbial groups at 80 days after seed sowing of maize plants irrigated with fresh and saline water in sodic-saline soil after the application of biochar and PGPR during 2018 season <sup>§</sup>.

| Treatment                  |                       | Urease<br>(mg TPF g <sup>-1</sup> dry<br>soil d <sup>-1</sup> ) | Dehydrogenase<br>(mg NH <sub>4</sub> <sup>+</sup> g <sup>-1</sup> dry<br>soil d <sup>-1</sup> ) | Bacteria<br>(Log cfu g <sup>-1</sup> soil) | <i>Azotobacter</i><br>(Log cfu g <sup>-1</sup> soil) | <i>Bacillus spp</i><br>(Log cfu g <sup>-1</sup> soil) |
|----------------------------|-----------------------|-----------------------------------------------------------------|-------------------------------------------------------------------------------------------------|--------------------------------------------|------------------------------------------------------|-------------------------------------------------------|
| Fresh<br>water             | Control               | 120.70 ± 2.39 de                                                | 60.42 ± 3.06 g                                                                                  | 2.79 ± 0.05 c                              | 0.91 ± 0.02 f                                        | 1.72 ± 0.02 d                                         |
|                            | PGPR <sup>†</sup>     | 154.44 ± 3.74 c                                                 | 91.42 ± 1.15 d                                                                                  | 3.36 ± 0.04 b                              | 1.74 ± 0.02 c                                        | 3.22 ± 0.09 b                                         |
|                            | Biochar <sup>‡</sup>  | 172.44 ± 1.84 b                                                 | 111.22 ± 2.11 c                                                                                 | 3.38 ± 0.03 b                              | 1.76 ± 0.01 c                                        | 3.32 ± 0.03 b                                         |
|                            | Combined <sup>¥</sup> | 220.15 ± 2.41 a                                                 | 146.78 ± 4.07 a                                                                                 | 5.87 ± 0.10 a                              | 2.12 ± 0.02 a                                        | 3.71 ± 0.04 a                                         |
| Saline<br>water            | Control               | 90.33 ± 1.74 f                                                  | 38.12 ± 2.04 h                                                                                  | 1.54 ± 0.05 e                              | 0.62 ± 0.03 g                                        | 1.02 ± 0.01 e                                         |
|                            | PGPR                  | 113.74 ± 2.18 e                                                 | 70.26 ± 0.77 f                                                                                  | 2.53 ± 0.04 d                              | 1.22 ± 0.02 e                                        | 1.66 ± 0.02 d                                         |
|                            | Biochar               | 123.62 ± 3.42 d                                                 | 84.38 ± 0.74 e                                                                                  | 2.74 ± 0.12 c                              | 1.36 ± 0.01 d                                        | 1.74 ± 0.04 d                                         |
|                            | Combined              | 158.14 ± 2.37 c                                                 | 117.89 ± 1.86 b                                                                                 | 3.27 ± 0.08 b                              | 1.85 ± 0.03 b                                        | 2.85 ± 0.04 c                                         |
| <b>F-test</b>              |                       |                                                                 |                                                                                                 |                                            |                                                      |                                                       |
| <i>P</i> Water             |                       | < 0.0001                                                        | < 0.0001                                                                                        | < 0.0001                                   | < 0.0001                                             | < 0.0001                                              |
| <i>P</i> Treatment         |                       | < 0.0001                                                        | < 0.0001                                                                                        | < 0.0001                                   | < 0.0001                                             | < 0.0001                                              |
| <i>P</i> Water × Treatment |                       | < 0.0001                                                        | = 0.0265                                                                                        | < 0.0001                                   | < 0.0001                                             | < 0.0001                                              |

<sup>§</sup> Data presented are means ± standard deviation (mean ± SD) of three biological replicates. Presented pairwise differences connecting letters (significance letters) were generated based on the *p*-value of the interaction between water type (as the main plots) and treatments (as subplots) that were mentioned as (*p*<sub>Water × Treatment</sub>). Means followed by different letters indicate statistically significant differences among treatments according to Tukey's honestly significant difference (HSD) test (*p* ≤ 0.05), whereas means followed by the same letters indicate no statistically significant differences among them.

<sup>†</sup> PGPR (*Azotobacter chroococcum* SARS 10 and *Pseudomonas koreensis* MG209738) added at a 1:1 ratio

<sup>‡</sup> Biochar is added at the rate of 1.0 kg m<sup>-2</sup> (10 ton ha<sup>-1</sup>)

<sup>¥</sup> PGPR at a 1:1 ratio + Biochar at the rate of 1.0 kg m<sup>-2</sup> (10 ton ha<sup>-1</sup>)

Means followed by different letters indicate statistically significant differences among treatments according to Tukey's honestly significant difference (HSD) test (*P* ≤ 0.05), whereas means followed by the same letters indicate no statistically significant differences among them.

**Table S2:** Yield and yield components of maize plants irrigated with fresh and saline water in sodic-saline soil in presence of biochar and PGPR during 2018 season <sup>§</sup>.

| Treatment                  |                       | Number of<br>Grains ear <sup>-1</sup> | 100-Grain weight<br>(g) | Grain yield<br>(ton/ha) | Stover yield<br>(ton/ha) | Harvest index<br>(%) |
|----------------------------|-----------------------|---------------------------------------|-------------------------|-------------------------|--------------------------|----------------------|
| Fresh<br>water             | Control               | 416.38 ± 1.10 e                       | 29.16 ± 0.82 cd         | 4.49 ± 0.03 e           | 8.66 ± 0.12 d            | 34.12 ± 0.23 cd      |
|                            | PGPR <sup>†</sup>     | 432.13 ± 1.41 c                       | 31.83 ± 0.52 b          | 5.16 ± 0.04 c           | 9.66 ± 0.09 b            | 34.82 ± 0.52 bc      |
|                            | Biochar <sup>‡</sup>  | 436.76 ± 1.10 b                       | 33.11 ± 0.65 b          | 5.51 ± 0.02 b           | 9.74 ± 0.07 b            | 36.14 ± 0.47 a       |
|                            | Combined <sup>¥</sup> | 443.04 ± 0.60 a                       | 35.50 ± 0.79 a          | 5.83 ± 0.01 a           | 10.47 ± 0.11 a           | 35.77 ± 0.36 ab      |
| Saline<br>water            | Control               | 403.74 ± 1.48 f                       | 23.39 ± 0.76 e          | 4.15 ± 0.04 f           | 8.27 ± 0.11 e            | 33.42 ± 0.72 d       |
|                            | PGPR                  | 416.79 ± 1.18 e                       | 27.35 ± 0.56 d          | 4.61 ± 0.05 d           | 8.58 ± 0.09 de           | 34.94 ± 0.25 bc      |
|                            | Biochar               | 419.15 ± 0.65 e                       | 28.48 ± 0.93 cd         | 4.65 ± 0.04 d           | 8.70 ± 0.11 d            | 34.85 ± 0.14 bc      |
|                            | Combined              | 423.21 ± 0.86 d                       | 29.86 ± 0.22 c          | 5.23 ± 0.02 c           | 9.21 ± 0.15 c            | 36.22 ± 0.27 a       |
| <b>F-test</b>              |                       |                                       |                         |                         |                          |                      |
| <i>P</i> Water             |                       | < 0.0001                              | < 0.0001                | < 0.0001                | < 0.0001                 | = 0.0488             |
| <i>P</i> Treatment         |                       | < 0.0001                              | < 0.0001                | < 0.0001                | < 0.0001                 | < 0.0001             |
| <i>P</i> Water × Treatment |                       | = 0.0002                              | = 0.0275                | < 0.0001                | < 0.0001                 | = 0.0078             |

<sup>§</sup> Data presented are means ± standard deviation (mean ± SD) of three biological replicates. Presented pairwise differences connecting letters (significance letters) were generated based on the *p*-value of the interaction between water type (as the main plots) and treatments (as subplots) that were mentioned as (*p*<sub>Water × Treatment</sub>). Means followed by different letters indicate statistically significant differences among treatments according to Tukey's honestly significant difference (HSD) test (*p* ≤ 0.05), whereas means followed by the same letters indicate no statistically significant differences among them.

<sup>†</sup> PGPR (*Azotobacter chroococcum* SARS 10 and *Pseudomonas koreensis* MG209738) added at a 1:1 ratio

<sup>‡</sup> Biochar is added at the rate of 1.0 kg m<sup>-2</sup> (10 ton ha<sup>-1</sup>)

<sup>¥</sup> PGPR at a 1:1 ratio + Biochar at the rate of 1.0 kg m<sup>-2</sup> (10 ton ha<sup>-1</sup>)

Means followed by different letters indicate statistically significant differences among treatments according to Tukey's honestly significant difference (HSD) test (*P* ≤ 0.05), whereas means followed by the same letters indicate no statistically significant differences among them.

**Table S3:** Physicochemical characteristics of the experimental soil in the two growing seasons 2018 and 2019

| Character                                                       |       | 2018                     | 2019         |
|-----------------------------------------------------------------|-------|--------------------------|--------------|
| pH (1:2.5 soil:water suspension)                                |       |                          |              |
| Soil depth (cm)                                                 | 0-20  | 8.22 ± 0.02 <sup>†</sup> | 8.28 ± 0.03  |
|                                                                 | 20-40 | 8.19 ± 0.02              | 8.21 ± 0.03  |
|                                                                 | 40-60 | 8.16 ± 0.04              | 8.18 ± 0.02  |
| Electrical conductivity (ECe, dS m <sup>-1</sup> ) <sup>‡</sup> |       |                          |              |
| Soil depth (cm)                                                 | 0-20  | 5.61 ± 0.01              | 5.66 ± 0.02  |
|                                                                 | 20-40 | 5.56 ± 0.02              | 5.59 ± 0.05  |
|                                                                 | 40-60 | 5.36 ± 0.03              | 5.54 ± 0.04  |
| ESP <sup>‡</sup> (%)                                            |       |                          |              |
| Soil depth (cm)                                                 | 0-20  | 22.61 ± 0.42             | 21.50 ± 0.32 |
|                                                                 | 20-40 | 22.52 ± 0.02             | 21.36 ± 0.22 |
|                                                                 | 40-60 | 22.46 ± 0.04             | 21.21 ± 0.35 |
| Soil organic matter (g kg <sup>-1</sup> )                       |       | 11.2 ± 0.03              | 11.7 ± 0.05  |
| Particle size distribution (%)                                  |       |                          |              |
| Sand                                                            |       | 27.22 ± 1.88             | 27.17 ± 1.98 |
| Silt                                                            |       | 25.23 ± 2.02             | 25.55 ± 1.99 |
| Clay                                                            |       | 47.55 ± 2.32             | 47.28 ± 2.03 |
| Texture grade                                                   |       | clayey                   | clayey       |
| Soluble cations (mEq L <sup>-1</sup> ) <sup>‡</sup>             |       |                          |              |
| Ca <sup>++</sup>                                                |       | 7.29 ± 0.87              | 9.42 ± 0.96  |
| Mg <sup>++</sup>                                                |       | 5.23 ± 1.32              | 6.34 ± 1.78  |
| Na <sup>+</sup>                                                 |       | 22.63 ± 3.08             | 21.08 ± 3.45 |
| K <sup>+</sup>                                                  |       | 0.39 ± 0.02              | 0.39 ± 0.02  |
| Soluble anions (meq L <sup>-1</sup> ) <sup>‡</sup>              |       |                          |              |
| CO <sub>3</sub> <sup>2-</sup>                                   |       | nd <sup>‡</sup>          | nd           |
| HCO <sub>3</sub> <sup>-</sup>                                   |       | 3.34 ± 0.68              | 3.05 ± 0.56  |
| Cl <sup>-</sup>                                                 |       | 18.21 ± 1.15             | 16.89 ± 1.23 |
| SO <sub>4</sub> <sup>2-</sup>                                   |       | 11.15 ± 3.04             | 10.74 ± 3.45 |
| Available macronutrients (mg kg <sup>-1</sup> )                 |       |                          |              |
| N                                                               |       | 9.70 ± 0.91              | 10.33 ± 1.71 |
| P                                                               |       | 8.24 ± 1.33              | 8.94 ± 1.54  |
| K                                                               |       | 344 ± 26.42              | 387 ± 24.33  |
| Total counts of soil microbes                                   |       |                          |              |
| Bacteria (CFU ×10 <sup>7</sup> g <sup>-1</sup> dry soil)        |       | 33 ± 1.2                 | 39 ± 1.5     |
| Fungi (CFU ×10 <sup>4</sup> g <sup>-1</sup> dry soil)           |       | 12 ± 0.9                 | 18 ± 1.1     |
| Actinomycetes (CFU ×10 <sup>5</sup> g <sup>-1</sup> dry soil)   |       | 23 ± 1.1                 | 24 ± 1.4     |

<sup>†</sup>Standard deviation; <sup>‡</sup> not detected; <sup>‡</sup> measured in soil paste extract; <sup>‡</sup> exchangeable sodium percentage, mEq L<sup>-1</sup>: milliequivalents per liter.

**Table S4:** Characterization of irrigation water during 2018 and 2019 growing seasons

| Character                                           | 2018         |                           | 2019         |                           |
|-----------------------------------------------------|--------------|---------------------------|--------------|---------------------------|
|                                                     | Fresh water  | Saline water <sup>*</sup> | Fresh water  | Saline water <sup>*</sup> |
| pH                                                  | 7.28 ± 0.81  | 8.36 ± 0.17               | 7.34 ± 0.76  | 8.39 ± 0.15               |
| EC (dS m <sup>-1</sup> )                            | 0.55 ± 0.02  | 3.93 ± 0.09               | 0.51 ± 0.01  | 3.97 ± 0.11               |
| SAR                                                 | 1.46 ± 0.04  | 7.79 ± 0.23               | 1.42 ± 0.06  | 7.88 ± 0.26               |
| Na <sup>+</sup> (mg L <sup>-1</sup> )               | 1.98 ± 0.06  | 16.3 ± 1.42               | 1.92 ± 0.04  | 16.81 ± 1.31              |
| Cl <sup>-</sup> (mg L <sup>-1</sup> )               | 3.45 ± 0.07  | 11.62 ± 0.82              | 3.38 ± 0.05  | 11.90 ± 0.91              |
| SO <sub>4</sub> <sup>2-</sup> (mg L <sup>-1</sup> ) | 0.12 ± 0.01  | 7.93 ± 0.21               | 0.14 ± 0.02  | 8.23 ± 0.25               |
| NH <sub>4</sub> <sup>+</sup> (mg L <sup>-1</sup> )  | 1.71 ± 0.03  | 2.12 ± 0.06               | 1.83 ± 0.05  | 2.33 ± 0.05               |
| COD (mg L <sup>-1</sup> )                           | 12.00 ± 0.92 | nd <sup>‡</sup>           | 11.00 ± 1.09 | nd                        |
| BOD (mg L <sup>-1</sup> )                           | 5.42 ± 0.39  | nd                        | 5.22 ± 0.62  | nd                        |
| SS (mg L <sup>-1</sup> )                            | 187 ± 12.5   | 18 ± 1.5                  | 181 ± 13.1   | 17 ± 1.6                  |
| DS (mg L <sup>-1</sup> )                            | 388 ± 32     | 2940 ± 126                | 393 ± 35     | 2922 ± 121                |

COD: Chemical Oxygen Demand; BOD: Biological Oxygen Demand; SS: Suspended solids; DS: Dissolved solids. <sup>\*</sup>Well water at a depth of 20 m; <sup>‡</sup>not detected.

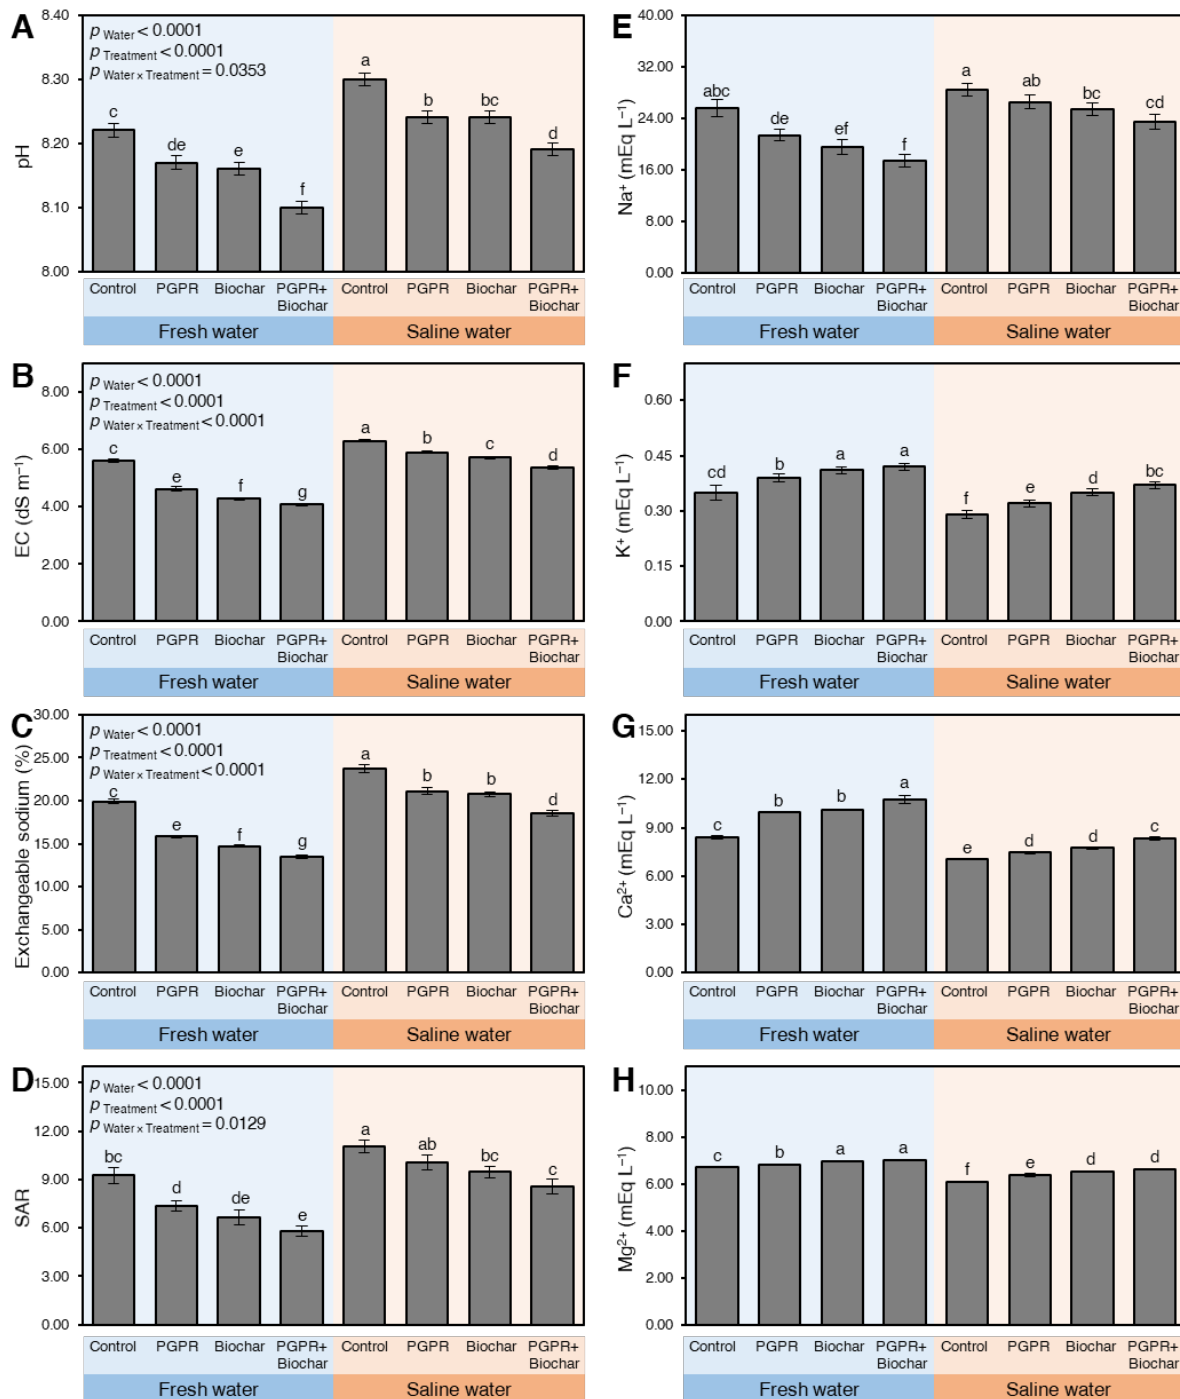

**Figure S1:** Soil chemical properties at the harvest time of maize plants growing in sodic-saline soil and irrigated with fresh and saline water after the application of biochar and PGPR during 2018 season. Data presented are means  $\pm$  standard deviation (mean  $\pm$  SD) of three biological replicates. Presented pairwise differences connecting letters (significance letters) were generated based on the  $p$ -value of the interaction between water type (as the main plots) and treatments (as subplots) that were mentioned as ( $p_{\text{Water} \times \text{Treatment}}$ ). Means followed by different letters indicate statistically significant differences among treatments according to Tukey's honestly significant difference (HSD) test ( $P \leq 0.05$ ), whereas means followed by the same letters indicate no statistically significant differences among them. EC: Electrical conductivity; SAR: Sodium adsorption ratio; mEq L<sup>-1</sup>: milliequivalents per liter.

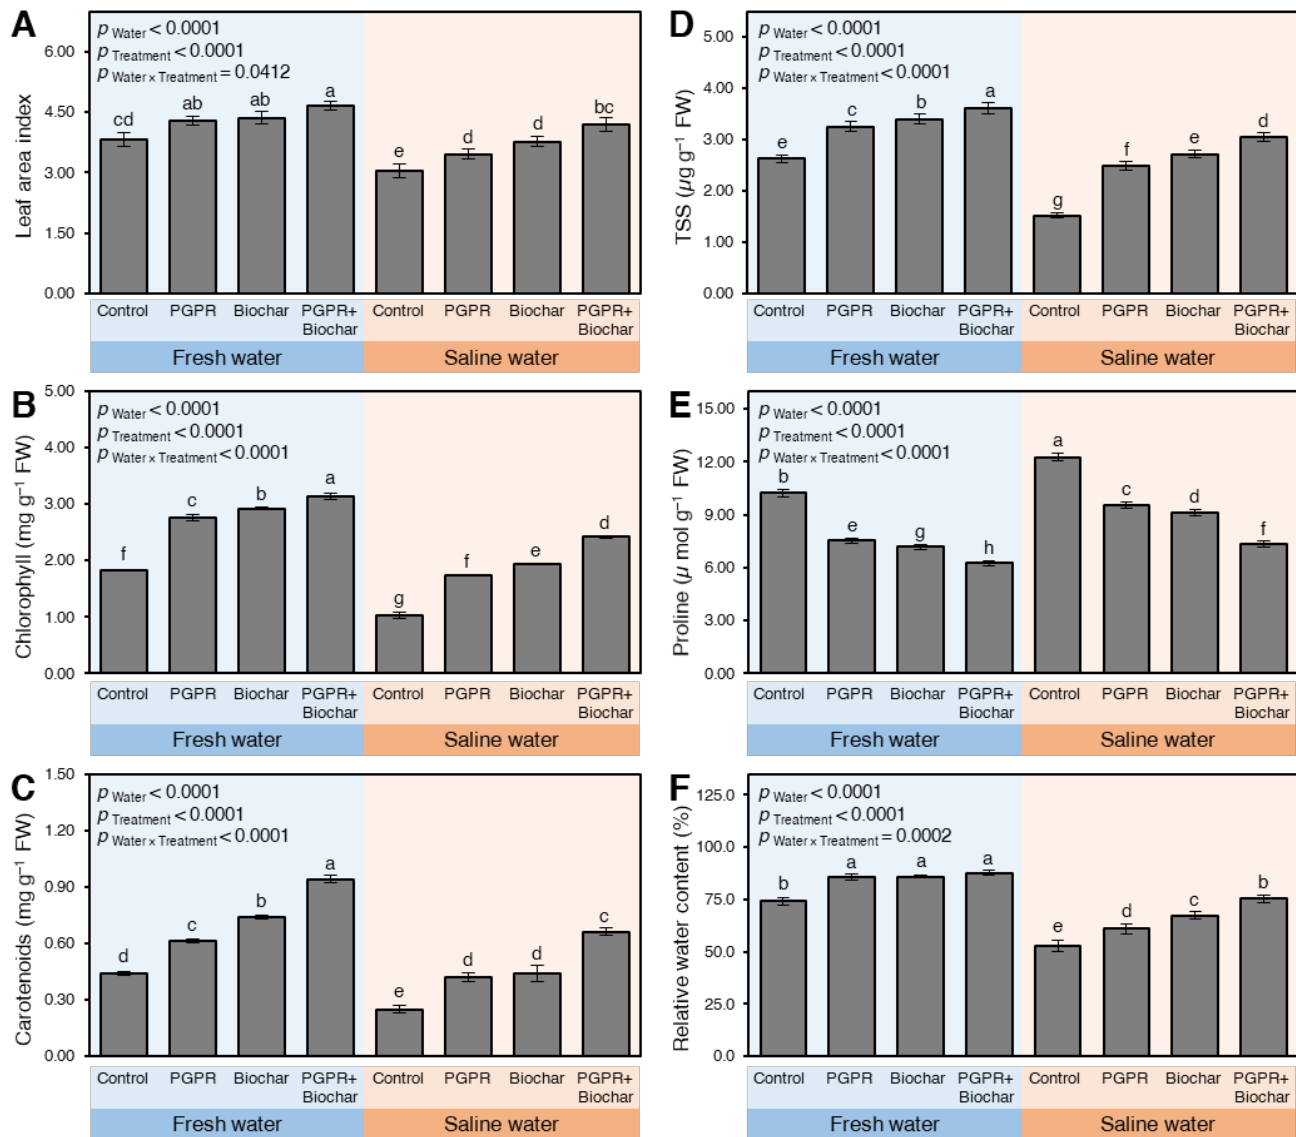

**Figure S2:** Leaf area index, photosynthetic pigments, and biochemical traits and of of maize plants growing in sodic-saline soil and irrigated with fresh and saline water after the application of biochar and PGPR during 2018 season. Data presented are means  $\pm$  standard deviation (mean  $\pm$  SD) of three biological replicates. Presented pairwise differences connecting letters (significance letters) were generated based on the  $p$ -value of the interaction between water type (as the main plots) and treatments (as subplots) that were mentioned as ( $p_{\text{Water} \times \text{Treatment}}$ ). Means followed by different letters indicate statistically significant differences among treatments according to Tukey's honestly significant difference (HSD) test ( $P \leq 0.05$ ), whereas means followed by the same letters indicate no statistically significant differences among them. **TSS:** Total soluble sugar.

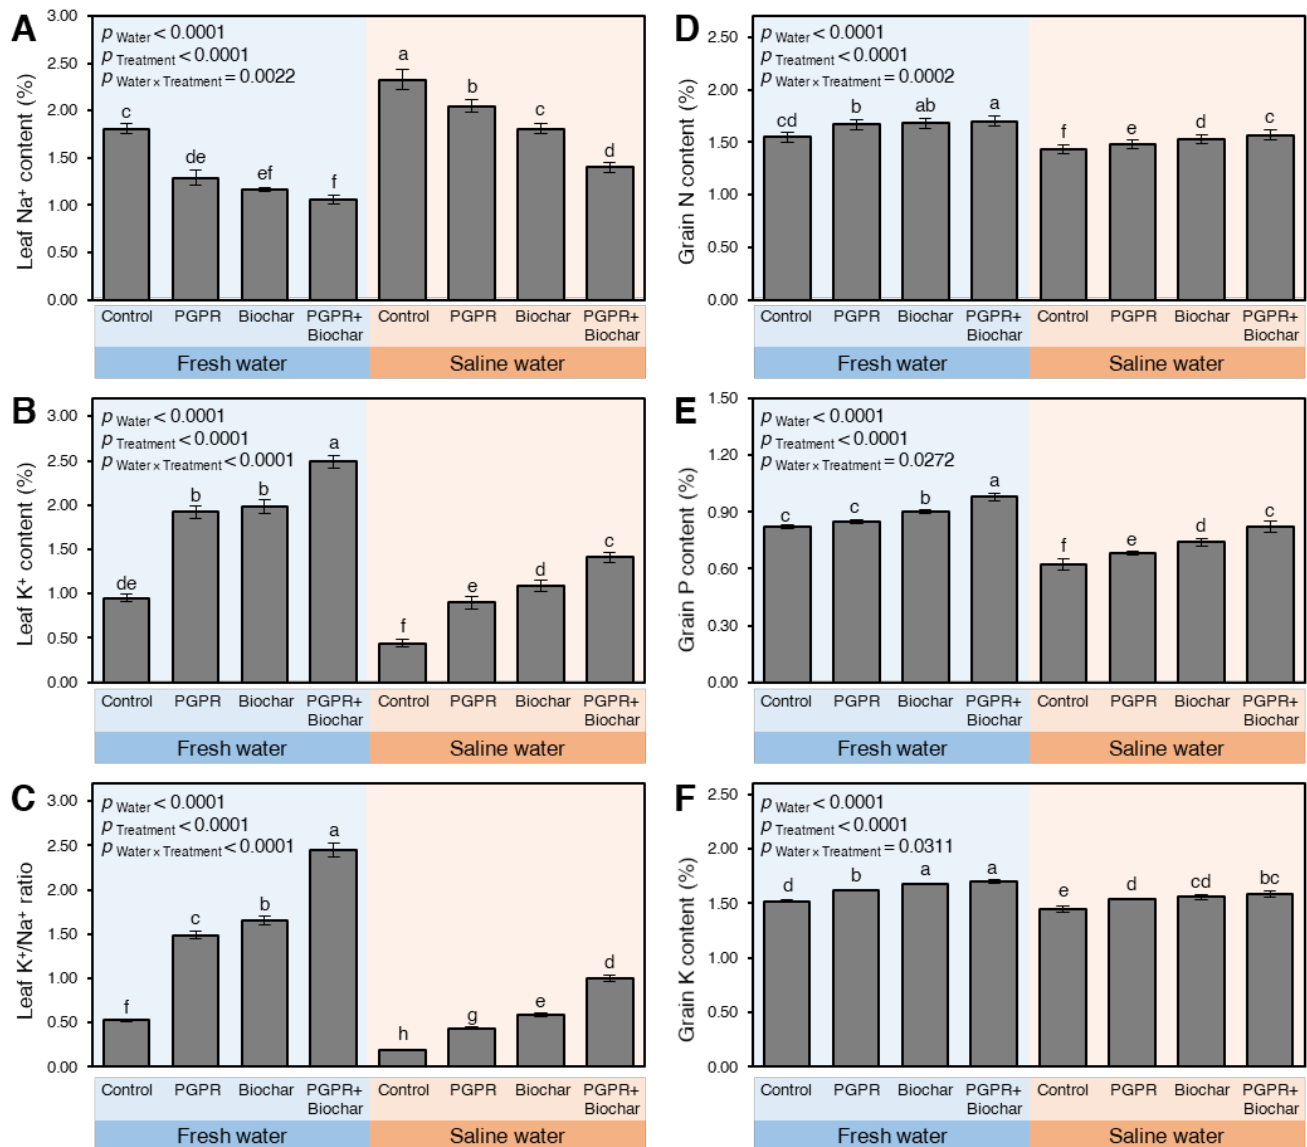

**Figure S3:** The leaf content of Na<sup>+</sup>, K<sup>+</sup>, K<sup>+</sup>/Na<sup>+</sup> ratio, and the NPK content of grains of maize plants growing in sodic-saline soil and irrigated with fresh and saline water after the application of biochar and PGPR during 2018 season. Data presented are means  $\pm$  standard deviation (mean  $\pm$  SD) of three biological replicates. Presented pairwise differences connecting letters (significance letters) were generated based on the  $p$ -value of the interaction between water type (as the main plots) and treatments (as subplots) that were mentioned as ( $p_{\text{Water} \times \text{Treatment}}$ ). Means followed by different letters indicate statistically significant differences among treatments according to Tukey's honestly significant difference (HSD) test ( $p \leq 0.05$ ), whereas means followed by the same letters indicate no statistically significant differences among them.
